# Supplementary material for: Effect of Experiential Vegetable Education Program on Mediating Factors of Vegetable Consumption in Australian Primary School Students: A Cluster-Randomized Controlled Trial
Source: Nutrients. 2020 Aug 5;12(8):2343. doi: 10.3390/nu12082343 (PMC7468916; doi:10.3390/nu12082343)
Supplement: Supplementary file 1 [file nutrients-12-02343-s001.pdf]

Supplementary data

**Table S1.** Characteristics of study participants in the total sample, the students who remained in the trial and drop-out after baseline.

| Characteristics             | Total at baseline<br>( <i>n</i> = 2215) | Students in analysis<br>( <i>n</i> = 1639) | Student drop-outs<br>( <i>n</i> = 576) | <i>p</i> Value <sup>1</sup> |
|-----------------------------|-----------------------------------------|--------------------------------------------|----------------------------------------|-----------------------------|
| Intervention (%)            |                                         |                                            |                                        |                             |
| Intervention low            | 40.0%                                   | 32.0%                                      | 62.7%                                  | <0.0001                     |
| Intervention high           | 38.5%                                   | 43.8%                                      | 23.6%                                  |                             |
| Control                     | 21.4%                                   | 24.2%                                      | 13.7%                                  |                             |
| Year level <sup>2</sup> (%) |                                         |                                            |                                        | 0.538                       |
| Lower                       | 22.3%                                   | 21.8%                                      | 24.0%                                  |                             |
| Middle                      | 44.1%                                   | 44.2%                                      | 43.6%                                  |                             |
| Upper                       | 33.6%                                   | 34.0%                                      | 32.5%                                  |                             |
| Gender (%)                  |                                         |                                            |                                        | 0.741                       |
| Boy                         | 48.7%                                   | 48.5%                                      | 49.3%                                  | <0.0001                     |
| Girl                        | 51.3%                                   | 51.5%                                      | 50.7%                                  |                             |
| SES <sup>3</sup> (%)        |                                         |                                            |                                        |                             |
| Low                         | 28.9%                                   | 30.3%                                      | 25.0%                                  |                             |
| Medium                      | 44.8%                                   | 38.9%                                      | 61.8%                                  |                             |
| High                        | 26.3%                                   | 30.9%                                      | 13.2%                                  |                             |
| State (%)                   |                                         |                                            |                                        | 0.002                       |
| NSW                         | 36.4%                                   | 38.3%                                      | 31.1%                                  | <0.0001                     |
| SA                          | 63.6%                                   | 61.7%                                      | 68.9%                                  |                             |
| School size (%)             |                                         |                                            |                                        |                             |
| <400 students               | 50.9%                                   | 58.4%                                      | 29.5%                                  | <0.0001                     |
| 401-600 students            | 38.1%                                   | 27.6%                                      | 67.9%                                  |                             |
| >600 students               | 11.0%                                   | 14.0%                                      | 2.6%                                   |                             |

<sup>1</sup> *p* value based on Pearson Chi-Square analysis

<sup>2</sup> Year level: lower = year 2, middle = year 3 and 4, upper = year 5 and 6

<sup>3</sup> Based on Index of Relative Socio-Economic Advantage and Disadvantage (IRSEAD) scores from Australian Bureau of Statistics, Low = IRSEAD deciles 1-5, medium = IRSEAD deciles 6-8, high = IRSEAD deciles 9-10.
